# Supplementary material for: Modelling Renal Filtration and Reabsorption Processes in a Human Glomerulus and Proximal Tubule Microphysiological System
Source: MDPI journal article supplement (doi:10.3390/mi12080983), 2021-08-19
Supplement: s1 [file s1]

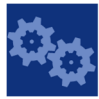

Supplementary Material

# Modelling Renal Filtration and Reabsorption Processes in a Human Glomerulus and Proximal Tubule Microphysiological System

Stephanie Y. Zhang and Gretchen J. Mahler \*

Department of Biomedical Engineering, The State University of New York at Binghamton, Binghamton, NY 13902, USA; szhan152@binghamton.edu

\* Correspondence: gmahler@binghamton.edu

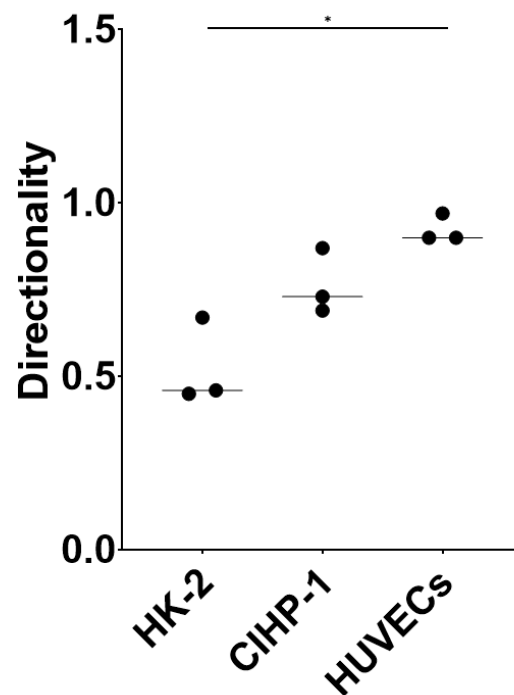

**Figure S1.** Directionality measurements for tri-culture cells (HK-2, CIHP-1, HUVECs). (\* Comparison of individual datapoints within each cell type,  $p < 0.05$ , non-parametric one-way ANOVA).

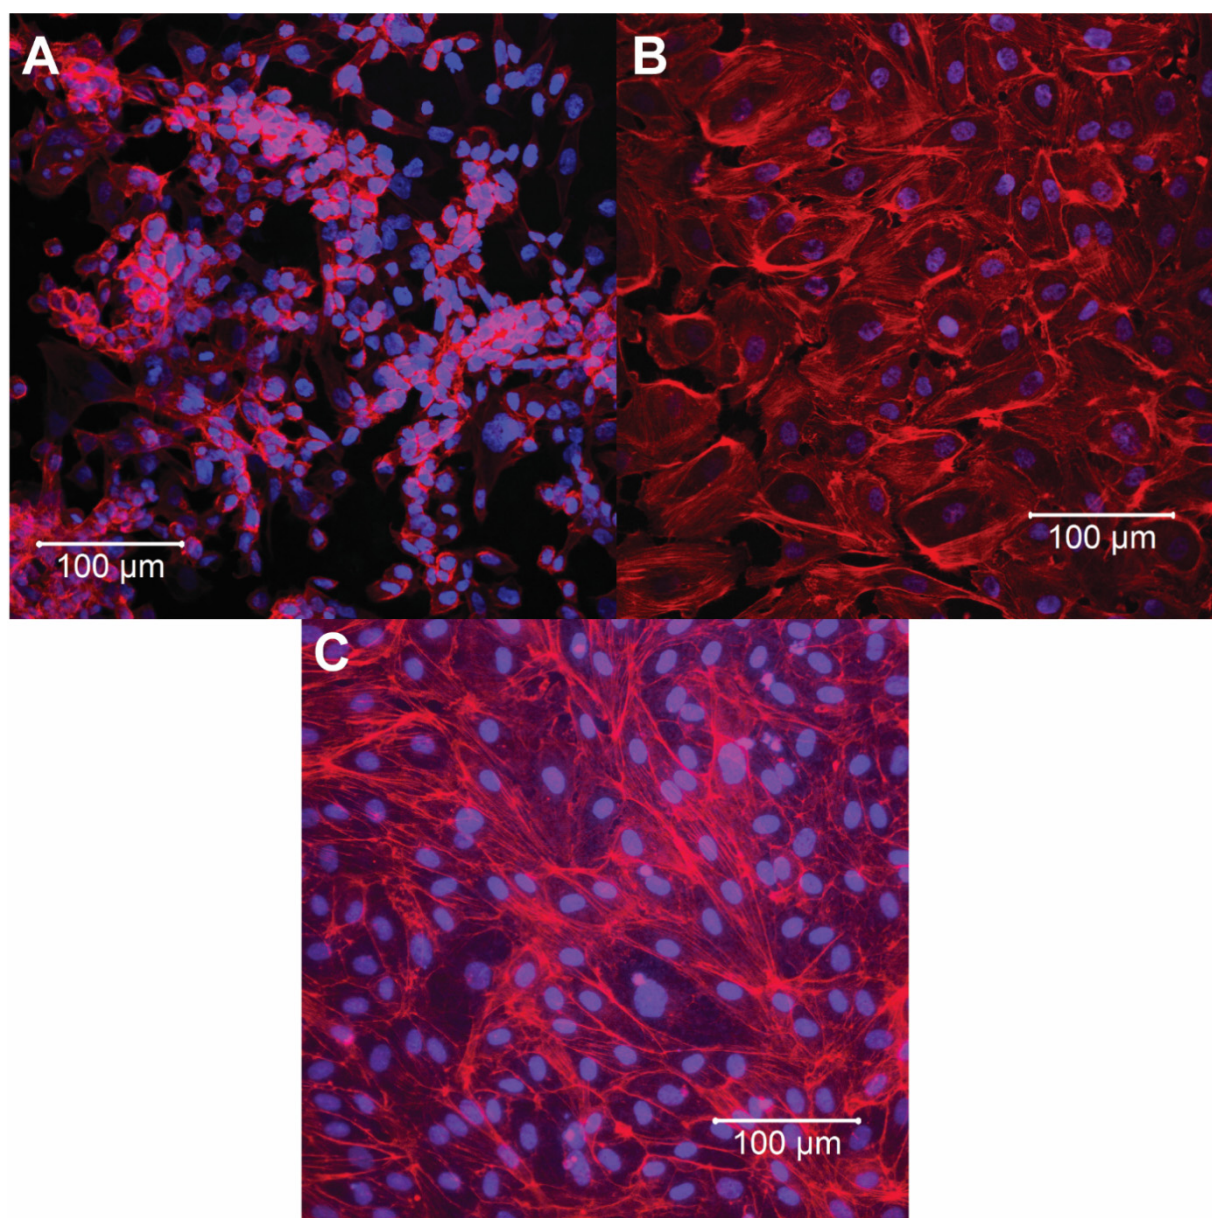

**Figure S2.** 2D confocal images of cells grown in ESFM under static conditions for 7 days. (A) HK-2 cells on polycarbonate membrane. (B) CIHP-1 cells on PES membrane. (C) HUVECs on PES membrane. Red= F-actin, Blue= DNA. Scale bar = 100  $\mu\text{m}$ .

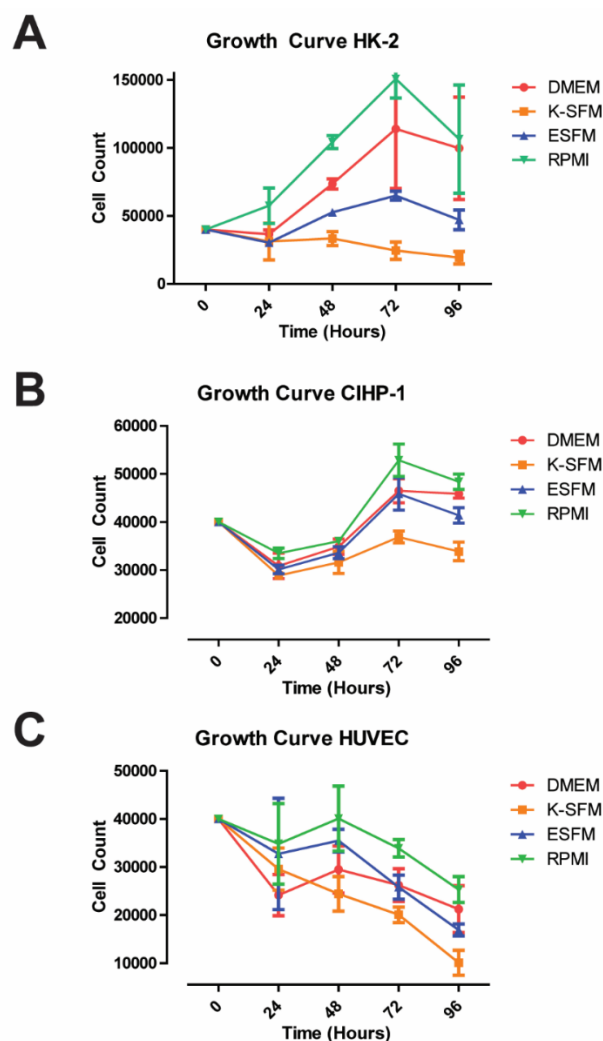

**Figure S3.** Growth curve for renal cells in four different types of medium. The four different types of medium were Dulbecco's Modified Eagle Medium (DMEM), Keratinocyte-Serum Free Media (KSFM), Endothelial Serum Free Medium (ESFM), and Roswell Park Memorial Institute media (RPMI-1640) and results are shown for the static culture of (A) Proximal tubule (HK-2) cells, (B) Conditionally immortalized human podocytes (CIHP-1) cells, and (C) Human umbilical vein endothelial cells (HUVECs) for 96 hours.

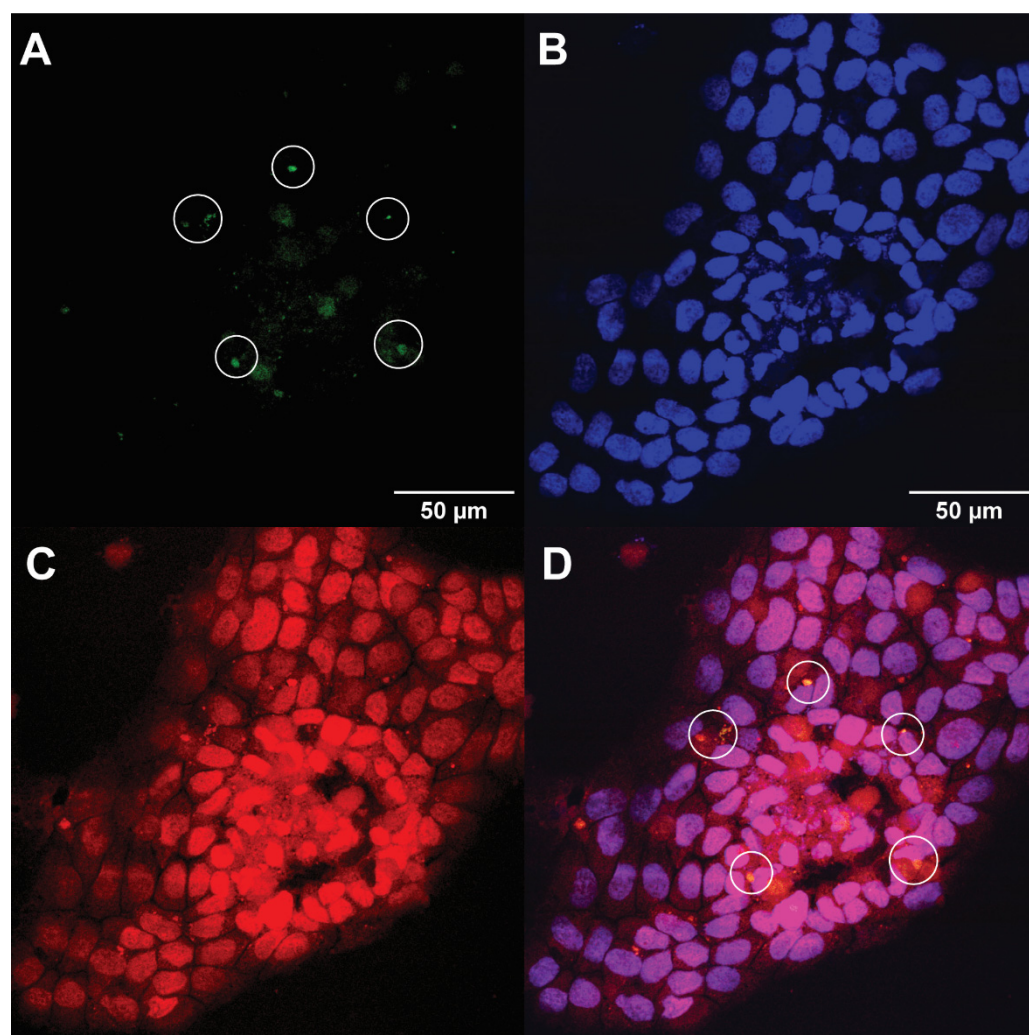

**Figure S4.** Localization of FITC HSA in CIHP-1. 2D confocal image at 40x magnification were taken of (A) FITC-HSA (green, circled) within the cell monolayer, (B) DNA (blue, Hoescht 33342), and (C) F-actin (red, Phalloidin 568). (D) Merged channels. Scale bar = 50  $\mu\text{m}$ .
